# Supplementary material for: Improving teaching about medically unexplained symptoms for newly qualified doctors in the UK: findings from a questionnaire survey and expert workshop
Source: PubMed Central journal article supplement (PMC5719648; doi:10.1136/bmjopen-2016-014720), 2017-04-27
Supplement: bmjopen-2016-014720supp001.pdf [file bmjopen-2016-014720supp001.pdf]

Thank you for taking the time to complete this short Expert Consultation Exercise. This exercise asks for your recommendations for the development of an educational intervention for FY1/FY2 doctors working with patients with medically unexplained symptoms (MUS) and should take no more than 5-10 minutes of your time.

**Please note that neither you nor your institution will be identified in any publications.**

We will share anonymised findings with respondents at the conclusion of the study.

Please click 'next' to begin the survey.

**1. Foundation Programme:**

**2. NHS Trust:**

**3. Your Job Title (including medical speciality):**

**Medically unexplained symptoms (MUS) can be defined as physical symptoms where no clear organic pathology is found. Examples include symptoms such as chest pain, fatigue, palpitations and shortness of breath; and syndromes such as IBS, fibromyalgia and chronic fatigue syndrome. Sometimes other terminology is used, e.g. functional disorders.**

**4. Does teaching about medically unexplained symptoms (MUS) form part of the teaching that FY1/FY2 doctors receive as part of their Foundation Training Programme?**

Yes

No

**5. If so, does this take the format of a formal teaching session?**

- Yes
- No
- Not Applicable

**6. If yes, could you give a brief description of the content of any formal teaching given on the topic of MUS, and the amount of time spent on this?**

**7. Is there any reference made (either within MUS teaching or elsewhere) to the topic of 'avoiding overinvestigation'?**

- Yes
- No
- Not Applicable

**8. If yes, please give brief details below:**

**9. Do you have any formal evaluation of the teaching provided on either the topic of 'MUS' or 'avoiding overinvestigation'?**

- Yes
- No
- Not Applicable

**10. If yes, please give brief details of the method of evaluation used:**

**11. Whether or not you provide any formal teaching about 'MUS' or 'avoiding overinvestigation', do these topics come up in any case-based discussions/Balint type groups which you may run as part of your course?**

- Yes
- No
- Not Applicable

**12. If so, please could you give brief details below:**

**13. What would you consider to be an ideal method of teaching about the topic of MUS?  
(Tick all that apply)**

- Lecture/seminar
- Case-based group discussions
- Role play (with simulated patient)
- Role play (with peers)
- One-to-one supervision
- Ward-based teaching
- GP/outpatient based teaching
- Advanced consultation skills training

Other (please specify)

**14. What would you consider to be the most feasible method of teaching about the topic of MUS? (Tick all that apply)**

- Lecture/seminar
- Case-based group discussions
- Role play (with simulated patient)
- Role play (with peers)
- One-to-one supervision
- Ward-based teaching
- GP/outpatient based teaching
- Advanced consultation skills training

Other (please specify)

**15. How many hours of teaching on the topic of MUS would you recommend per year at:**

FY1 Level

FY2 Level

**16. What barriers do you perceive to the delivery of teaching on this topic?**

**17. Please use the space below if you have any other comments or recommendations for teaching on this topic:**

**18. Would you be willing to share any details of teaching resources or evaluation methods you may have on these topics with other teachers?**

- Yes
- No
- Not Applicable

**19. And finally, would you be interested in taking part in a workshop to discuss the development of an educational intervention for FY1/FY2 doctors working with patients with medically unexplained symptoms (MUS)?**

- Yes
- Maybe
- No

**20. If you answered yes or maybe to Q18 or Q19 please provide your contact details in the space below:**

**Name**

**Email Address**

**Thank you very much for your recommendations**
